# Supplementary material for: The first rhodaboratrane: [RhCl(PPh3){B(mt)3}](Rh→B) (mt = methimazolyl)
Source: Royal Society of Chemistry journal article supplement (doi:10.1039/b413305f), 2004-11-25
Supplement: b413305f.pdf [file b413305f.pdf]

## Supplementary Data — X-Ray Crystallography

**Manuscript:** The First Rhodaboratrane:  $[\text{RhCl}(\text{PPh}_3)\{\text{B}(\text{mt})_3\}](\text{Rh} \rightarrow \text{B})$  (mt = methimazolyl)

**Authors:** Ian R. Crossley, Mark R. St.-J. Foreman, Anthony F. Hill,  
Andrew J.P. White and David J. Williams

**Table 1.** Comparative selected bond lengths (Å) and angles (°) for the two independent molecules (**A** and **B**) present in the crystals of **4**.

|              | <b>Mol. A</b> | <b>Mol. B</b> |              | <b>Mol. A</b> | <b>Mol. B</b> |
|--------------|---------------|---------------|--------------|---------------|---------------|
| Rh–Cl        | 2.6440(14)    | 2.6246(13)    | Rh–S(1)      | 2.3704(16)    | 2.3674(16)    |
| Rh–S(2)      | 2.3692(17)    | 2.3640(16)    | Rh–S(3)      | 2.3867(15)    | 2.3898(15)    |
| Rh–P         | 2.3148(13)    | 2.3264(14)    | Rh–B         | 2.132(6)      | 2.122(7)      |
| B–N(2)       | 1.550(8)      | 1.533(8)      | B–N(8)       | 1.541(7)      | 1.568(7)      |
| B–N(14)      | 1.566(7)      | 1.549(8)      |              |               |               |
| Cl–Rh–S(1)   | 90.26(5)      | 91.04(5)      | Cl–Rh–S(2)   | 101.20(6)     | 100.65(5)     |
| Cl–Rh–S(3)   | 80.14(5)      | 81.01(5)      | Cl–Rh–P      | 94.90(5)      | 94.31(5)      |
| Cl–Rh–B      | 165.91(16)    | 165.81(17)    | S(1)–Rh–S(2) | 168.54(5)     | 168.22(5)     |
| S(1)–Rh–S(3) | 91.49(6)      | 92.55(6)      | S(1)–Rh–P    | 92.44(5)      | 91.54(5)      |
| S(1)–Rh–B    | 84.23(17)     | 83.52(18)     | S(2)–Rh–S(3) | 90.78(6)      | 90.69(6)      |
| S(2)–Rh–P    | 86.34(5)      | 86.22(5)      | S(2)–Rh–B    | 84.67(17)     | 85.41(18)     |
| S(3)–Rh–P    | 173.69(5)     | 173.83(6)     | S(3)–Rh–B    | 87.04(16)     | 86.13(17)     |
| P–Rh–B       | 98.27(16)     | 98.92(17)     | Rh–B–N(2)    | 109.4(4)      | 110.5(4)      |
| Rh–B–N(8)    | 110.0(4)      | 109.3(4)      | Rh–B–N(14)   | 108.7(4)      | 109.8(4)      |
| N(2)–B–N(8)  | 115.4(4)      | 114.6(5)      | N(2)–B–N(14) | 107.1(4)      | 107.6(5)      |
| N(8)–B–N(14) | 106.1(4)      | 104.8(5)      |              |               |               |

**Fig. S1** The molecular structure of one (**B**) of the two independent molecules present in the crystals of **4**.

**Fig. S2** Overlay of the two independent molecules (**A** and **B**) present in the crystals of **4**. The r.m.s. fit of all the non-hydrogen atoms is *ca.* 0.14 Å.

**Fig. S3** The molecular structure of one (A) of the two independent molecules present in the crystals of **4** (30% probability ellipsoids).

**Fig. S4** The molecular structure of one (B) of the two independent molecules present in the crystals of **4** (30% probability ellipsoids).

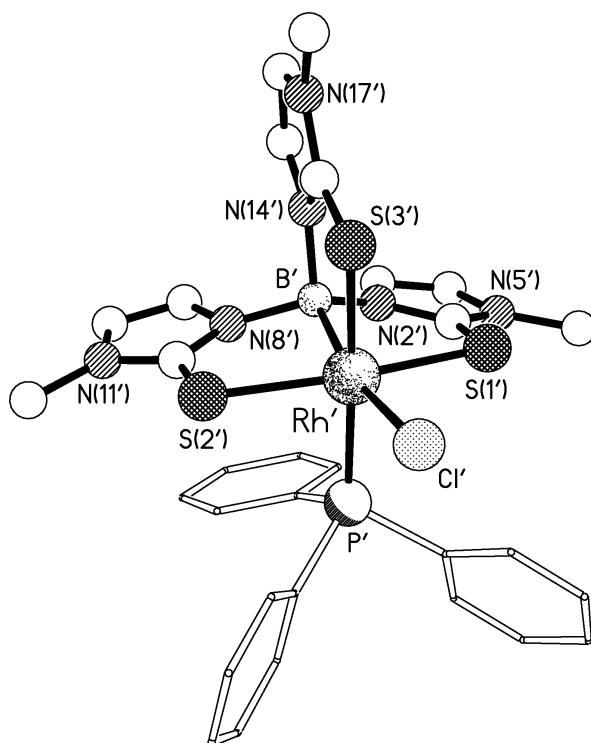

Fig. S1

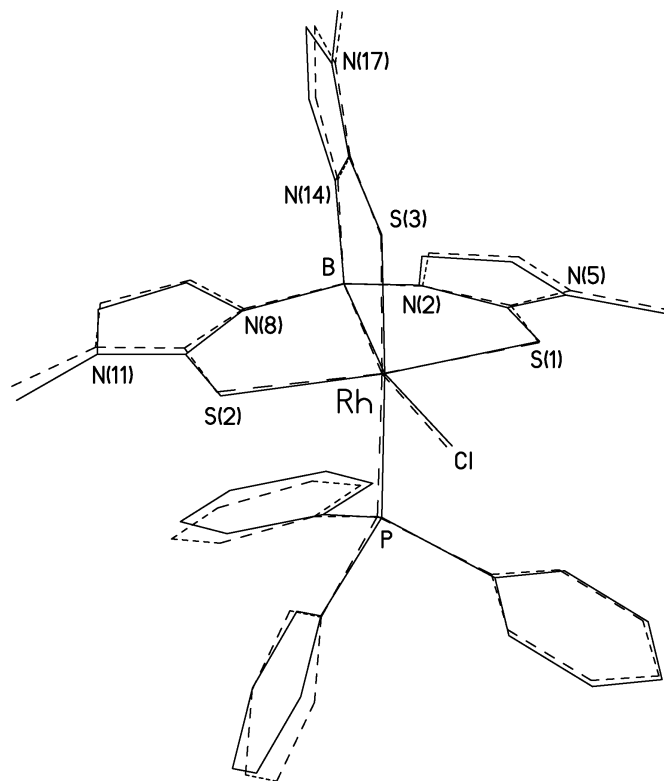

Fig. S2

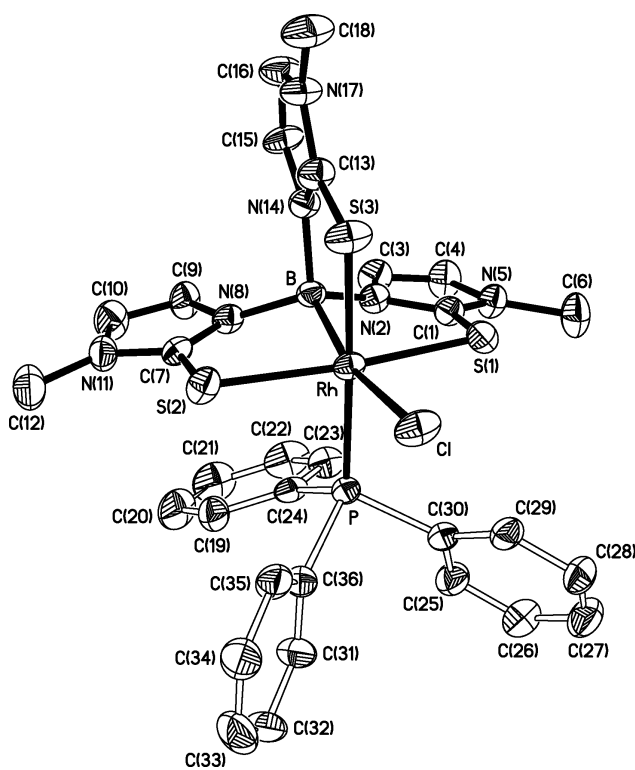

Fig. S3

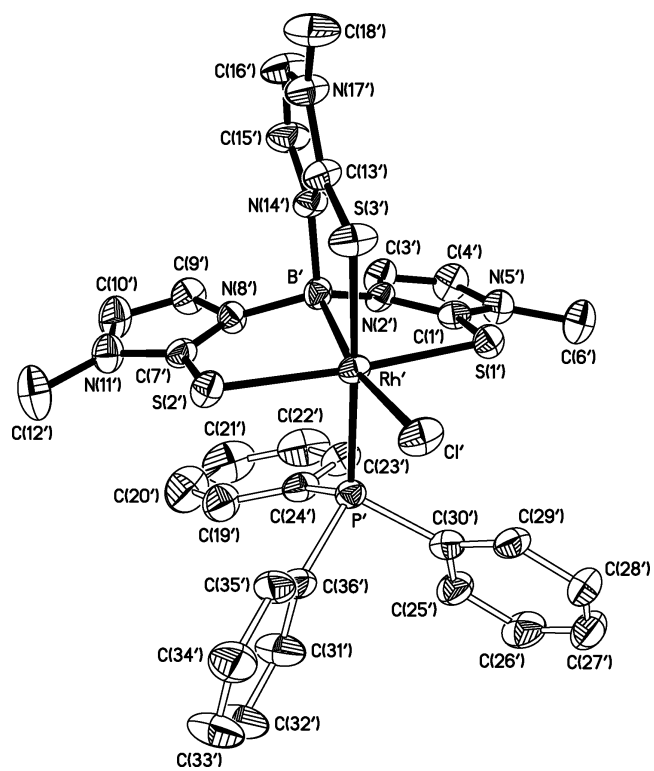

Fig. S4
